# Supplementary figures and images for: Exploring patterns of response across the lifespan: the Cambridge Centre for Ageing and Neuroscience (Cam-CAN) study
Source: Springer Nature journal article supplement (doi:10.1186/s12889-018-5663-7), 2018-06-18

**Additional file 1:** Flow of participants in Cam-CAN from sample to interview in further detail

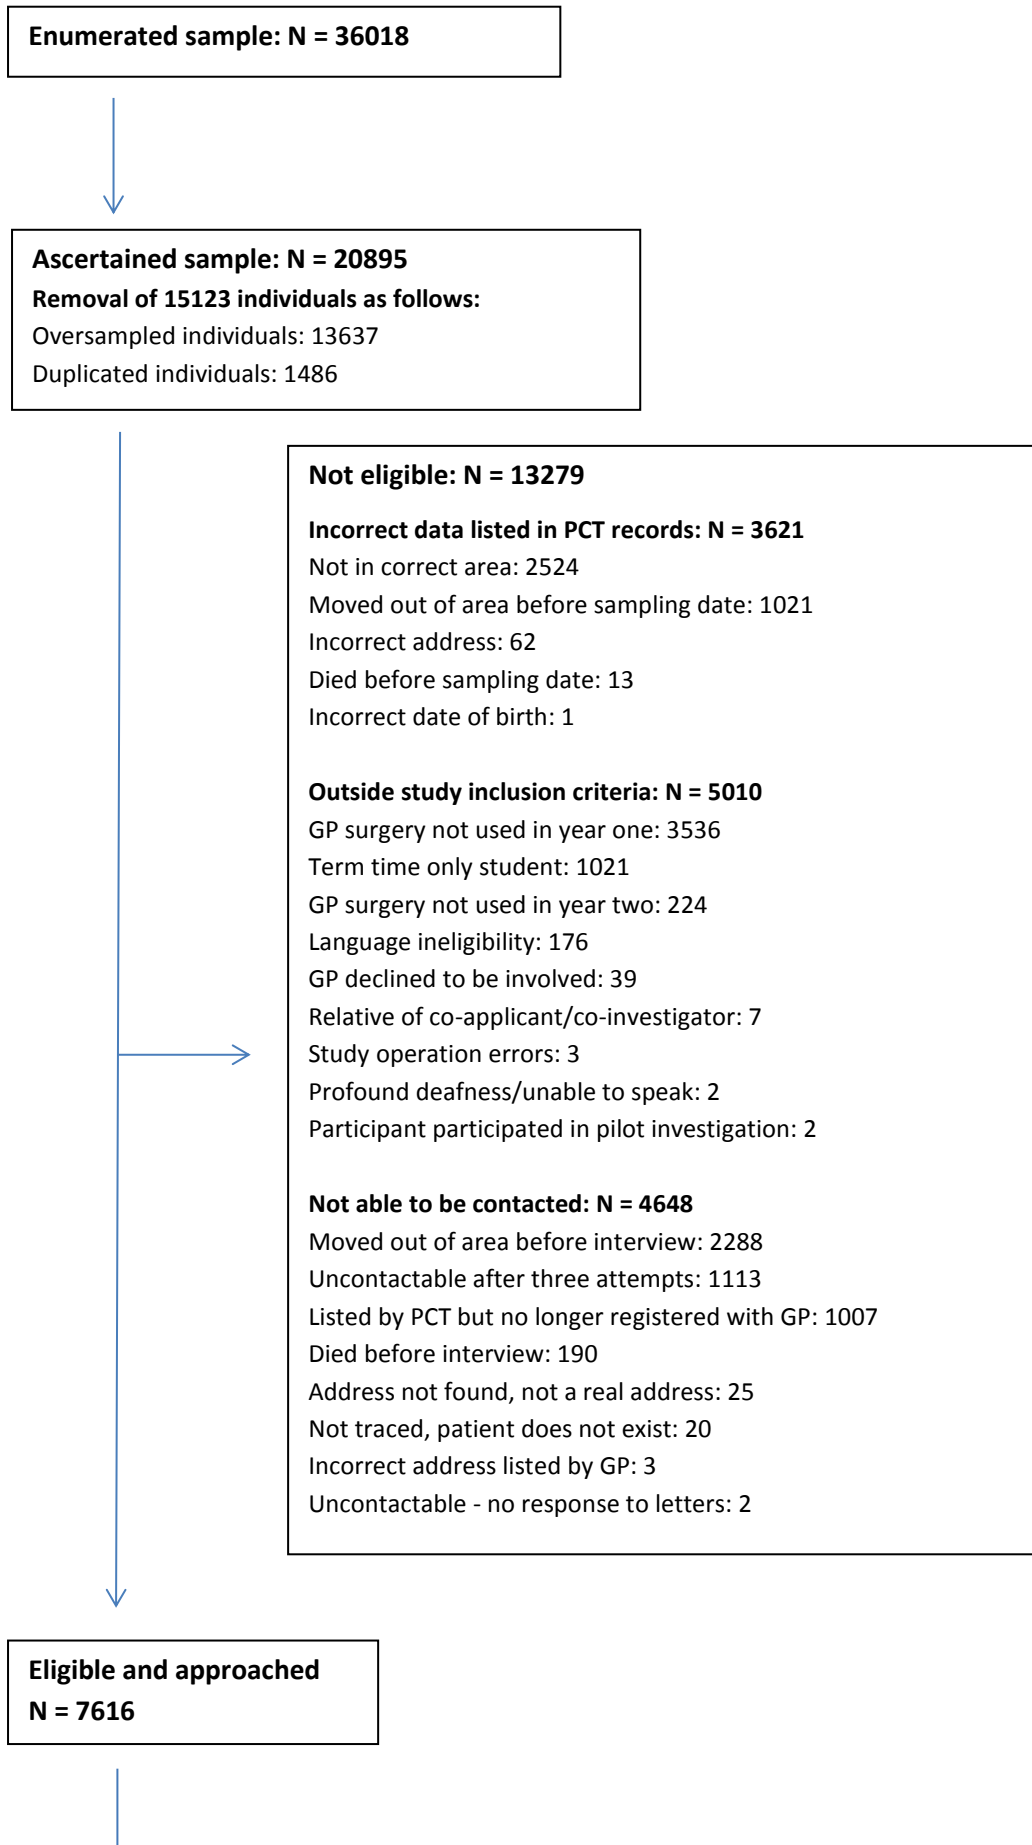

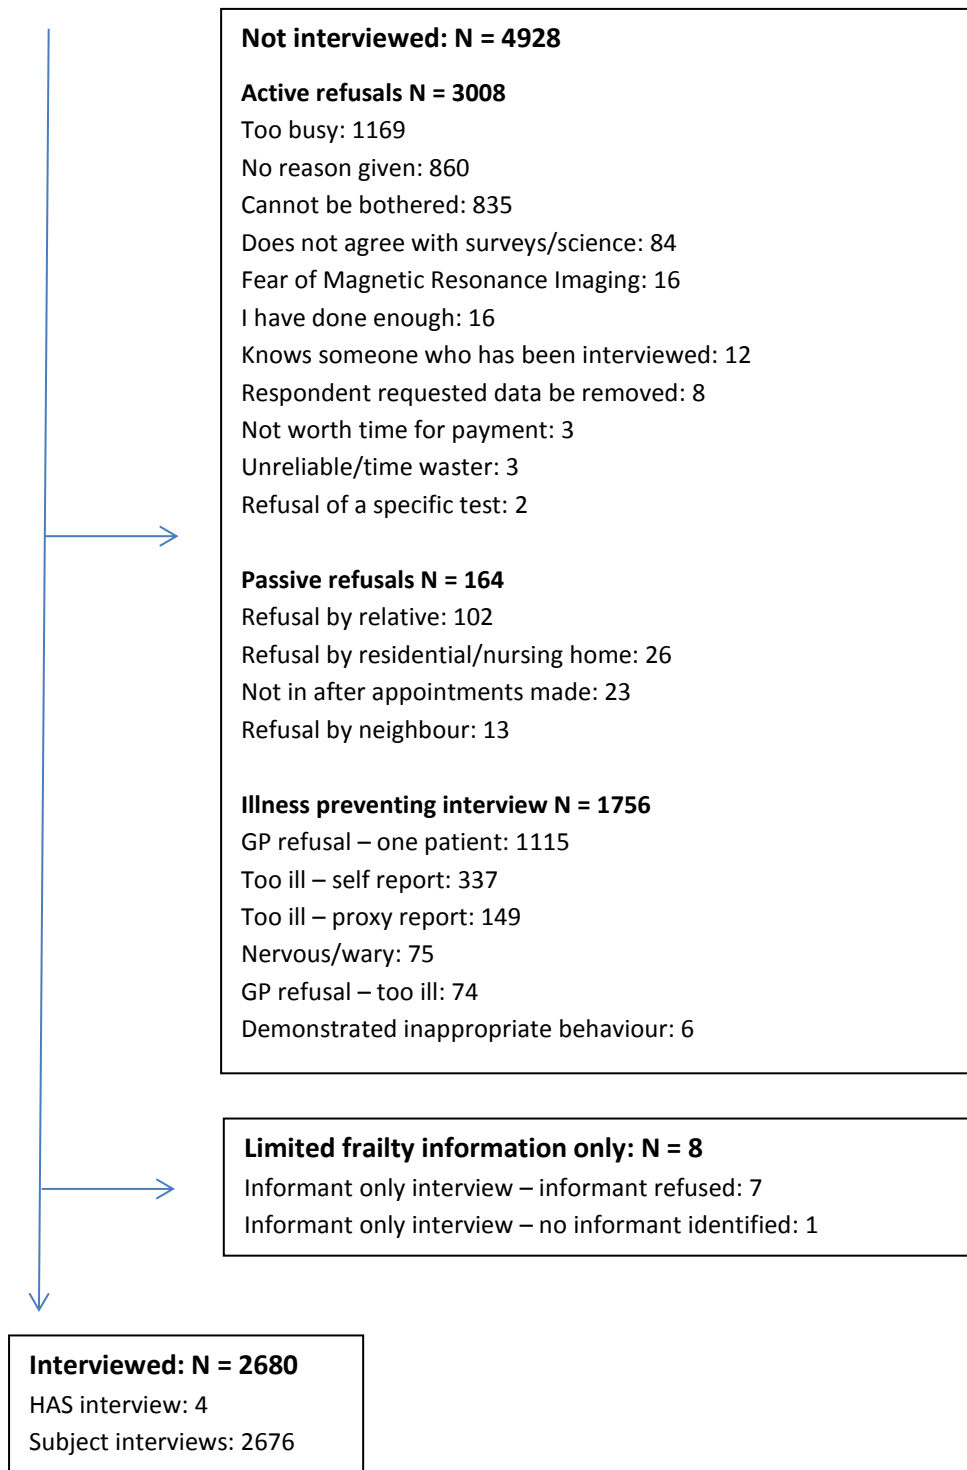

Supplement: MOESM1 [file 12889_2018_5663_MOESM1_ESM.pdf]
